# Supplementary material for: Key role of phosphorylation sites in ATPase domain and Linker region of MLH1 for DNA binding and functionality of MutLα
Source: Springer Nature journal article supplement (doi:10.1038/s41598-023-39750-x), 2023-08-02
Supplement: MOESM1 [file 41598_2023_39750_MOESM1_ESM.pdf]

# Figure S1

## Blot 1

MLH1  
PMS2 wt

|    |       |      |       |       |
|----|-------|------|-------|-------|
| wt | S477A | S87A | S446A | S456A |
| +  | +     | +    | +     | +     |

IP MLH1

\*

WB p-MLH1 ▶

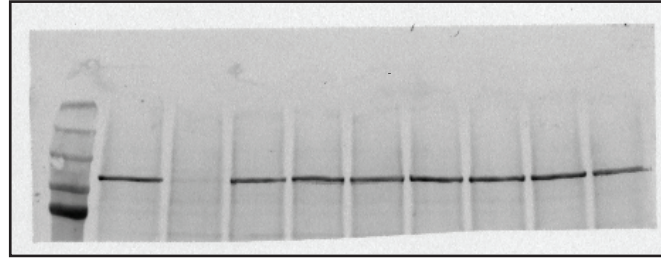

## Blot 2

MLH1  
PMS2 wt

|    |       |      |       |       |
|----|-------|------|-------|-------|
| wt | S477A | S87A | S446A | S456A |
| +  | +     | +    | +     | +     |

IP MLH1

\*

WB p-MLH1 ▶

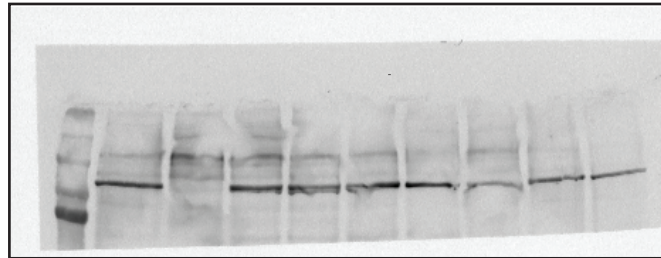

## Blot 3

MLH1  
PMS2 wt

|    |       |      |       |       |
|----|-------|------|-------|-------|
| wt | S477A | S87A | S446A | S456A |
| +  | +     | +    | +     | +     |

IP MLH1

\*

WB p-MLH1 ▶

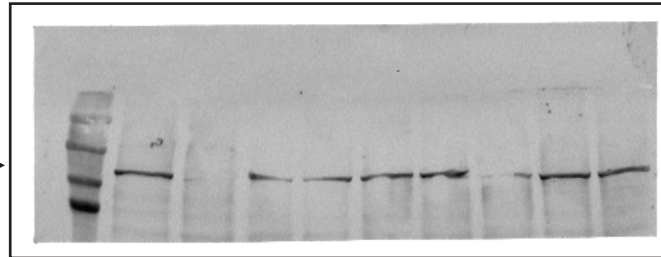

MLH1  
PMS2 wt

|    |       |      |       |       |
|----|-------|------|-------|-------|
| wt | S477A | S87A | S446A | S456A |
| +  | +     | +    | +     | +     |

IP MLH1

\*

WB MLH1 ▶

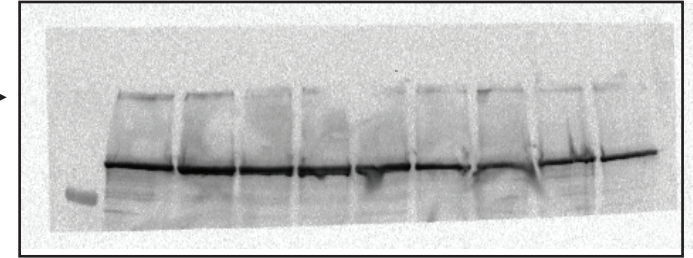

MLH1  
PMS2 wt

|    |       |      |       |       |
|----|-------|------|-------|-------|
| wt | S477A | S87A | S446A | S456A |
| +  | +     | +    | +     | +     |

IP MLH1

\*

WB MLH1 ▶

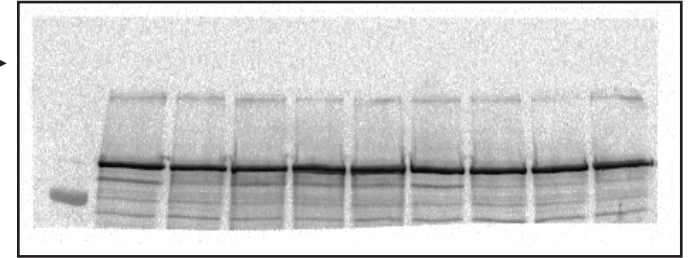

MLH1  
PMS2 wt

|    |       |      |       |       |
|----|-------|------|-------|-------|
| wt | S477A | S87A | S446A | S456A |
| +  | +     | +    | +     | +     |

IP MLH1

\*

WB MLH1 ▶

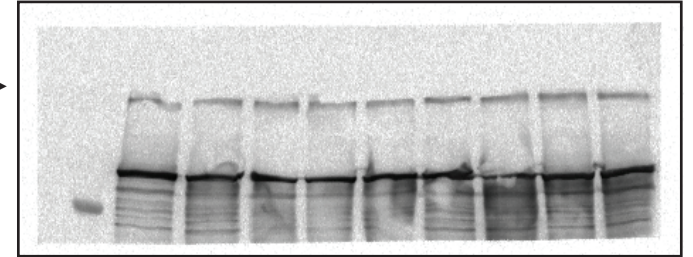

# Figure S2

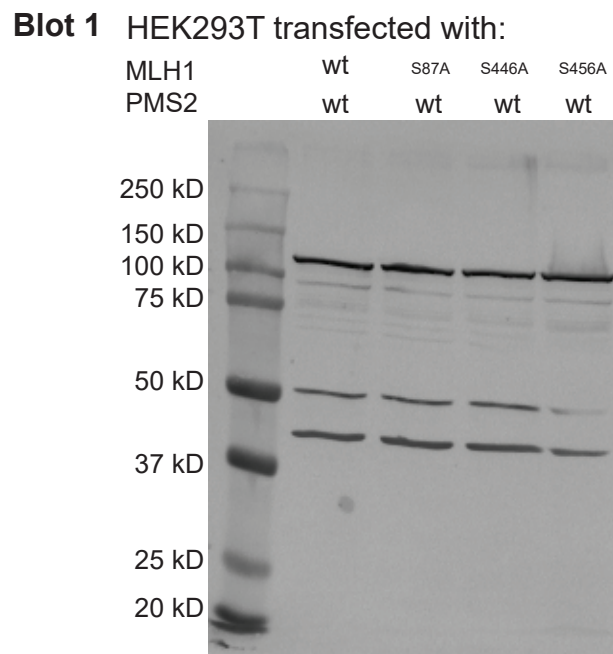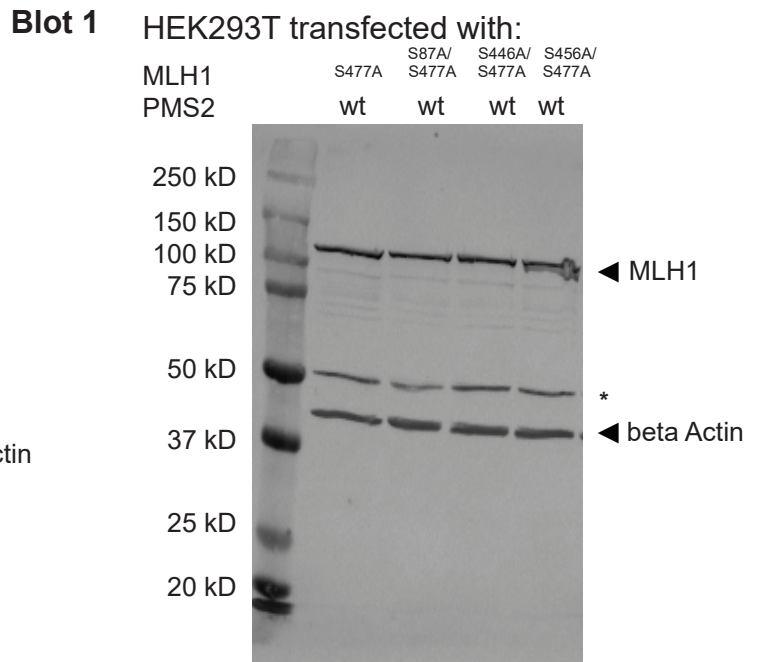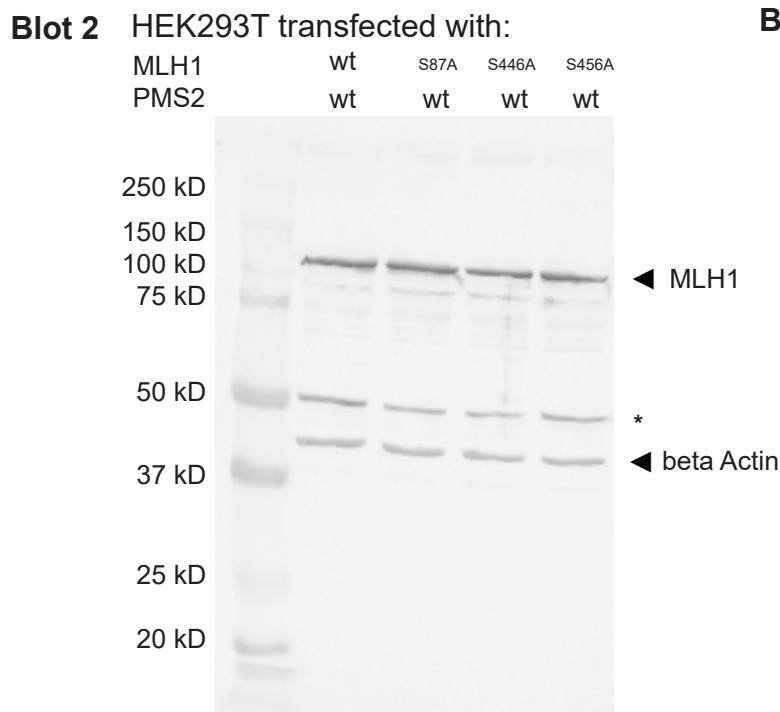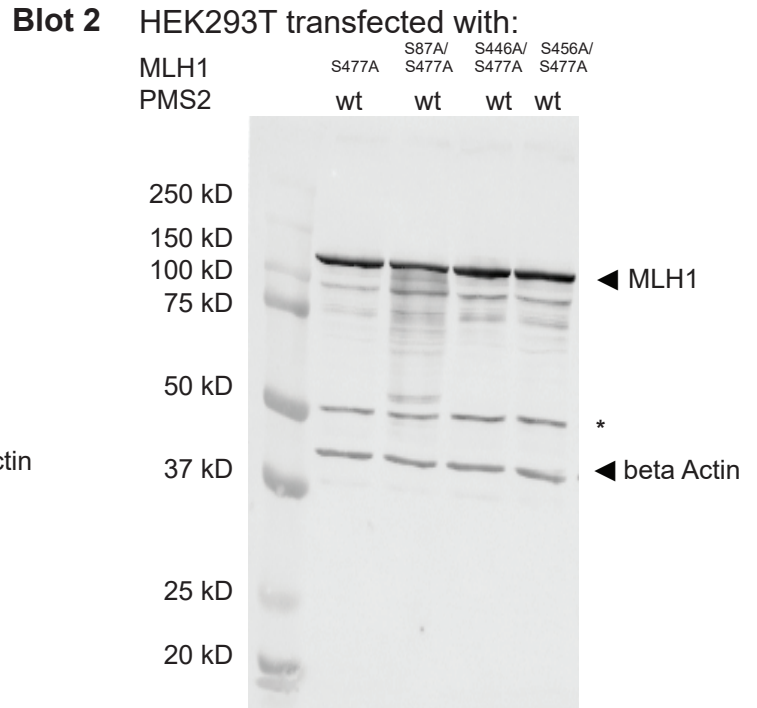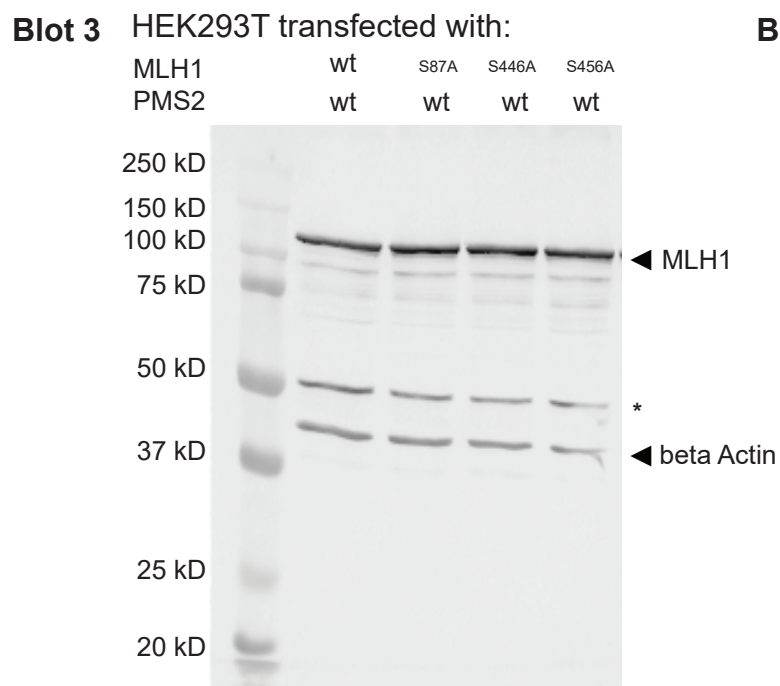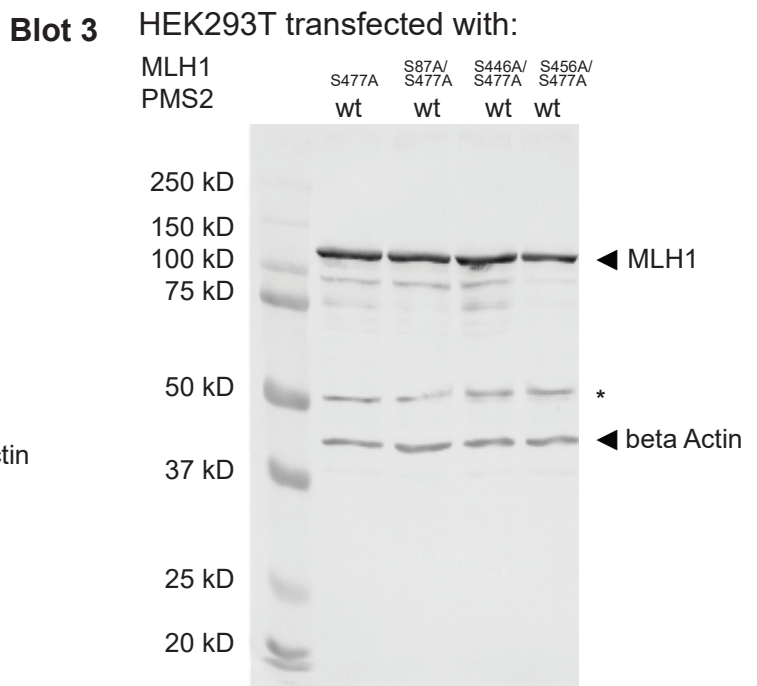

\* = unspecific binding

# Figure S3

**A**

MutLa wt

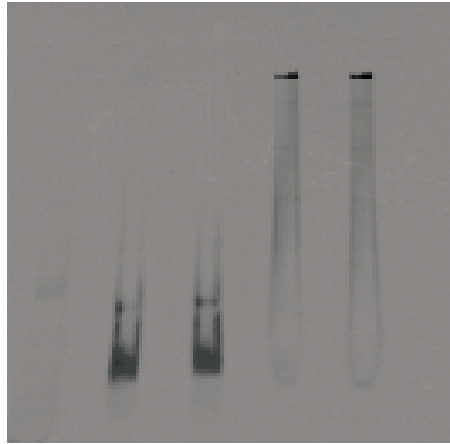

|                         |   |   |   |   |   |
|-------------------------|---|---|---|---|---|
| Marker                  | + | - | - | - | - |
| DNA substrate           | - | + | + | + | + |
| Sepharose               | - | - | + | - | - |
| Recombinant protein     | - | - | - | + | - |
| Sepharose-bound protein | - | - | - | - | + |

**B**

MutLa wt

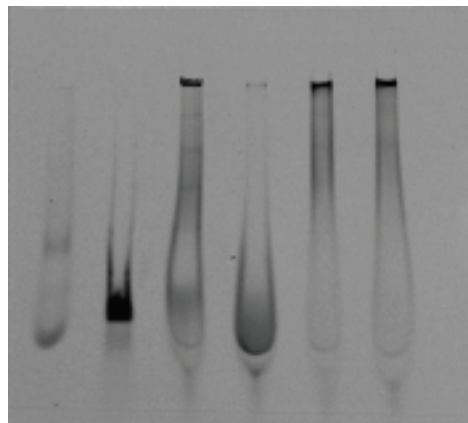

|                         |   |   |   |   |   |   |
|-------------------------|---|---|---|---|---|---|
| Marker                  | + | - | - | - | - | - |
| DNA substrate           | - | + | + | + | + | + |
| Sepharose-bound protein | - | - | + | + | + | + |
| 37°C                    | - | - | + | - | + | - |
| CIP                     | - | - | + | - | - | - |
| Calyculin               | - | - | - | + | - | - |

**Figure S4**

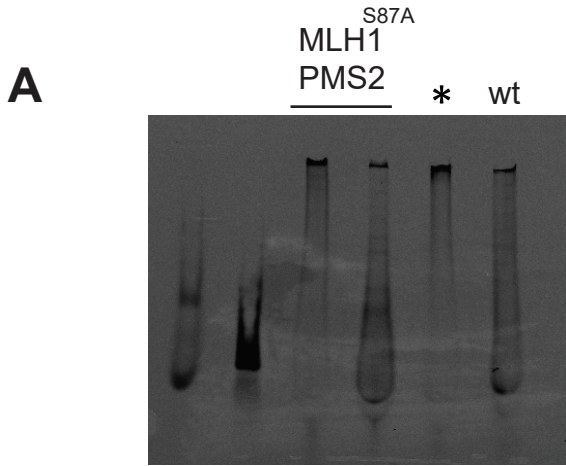

|                         |   |   |   |   |   |
|-------------------------|---|---|---|---|---|
| Marker                  | + | - | - | - | - |
| DNA substrate           | - | + | + | + | + |
| Sepharose-bound protein | - | - | + | + | + |
| CIP                     | - | - | + | - | - |
| Calyculin               | - | - | - | + | - |

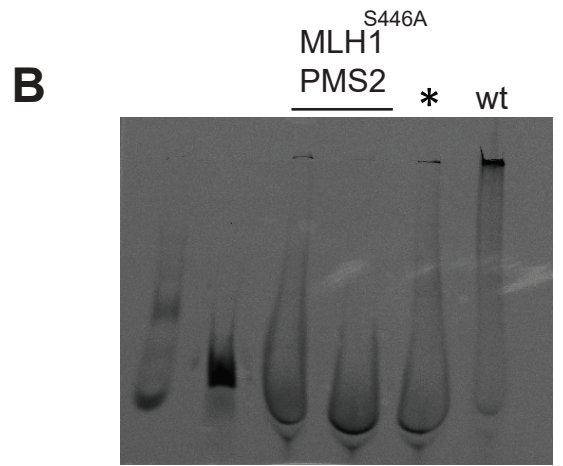

|                         |   |   |   |   |   |
|-------------------------|---|---|---|---|---|
| Marker                  | + | - | - | - | - |
| DNA substrate           | - | + | + | + | + |
| Sepharose-bound protein | - | - | + | + | + |
| CIP                     | - | - | + | - | - |
| Calyculin               | - | - | - | + | - |

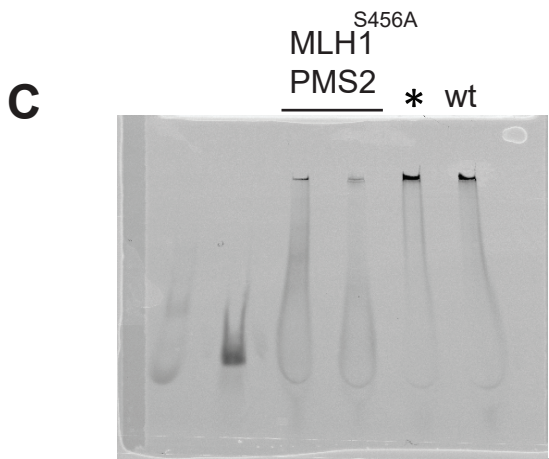

|                         |   |   |   |   |   |
|-------------------------|---|---|---|---|---|
| Marker                  | + | - | - | - | - |
| DNA substrate           | - | + | + | + | + |
| Sepharose-bound protein | - | - | + | + | + |
| CIP                     | - | - | + | - | - |
| Calyculin               | - | - | - | + | - |

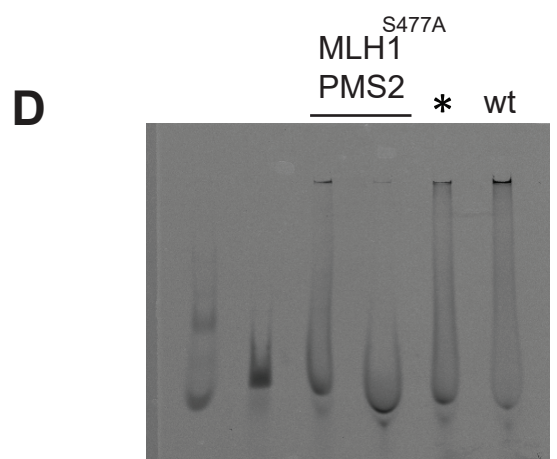

|                         |   |   |   |   |   |
|-------------------------|---|---|---|---|---|
| Marker                  | + | - | - | - | - |
| DNA substrate           | - | + | + | + | + |
| Sepharose-bound protein | - | - | + | + | + |
| CIP                     | - | - | + | - | - |
| Calyculin               | - | - | - | + | - |

\*Data not used.

# Figure S4

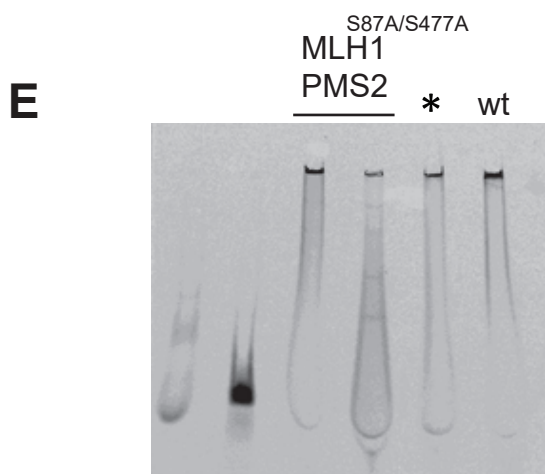

|                         |   |   |   |   |   |
|-------------------------|---|---|---|---|---|
| Marker                  | + | - | - | - | - |
| DNA substrate           | - | + | + | + | + |
| Sepharose-bound protein | - | - | + | + | + |
| CIP                     | - | - | + | - | - |
| Calyculin               | - | - | - | + | - |

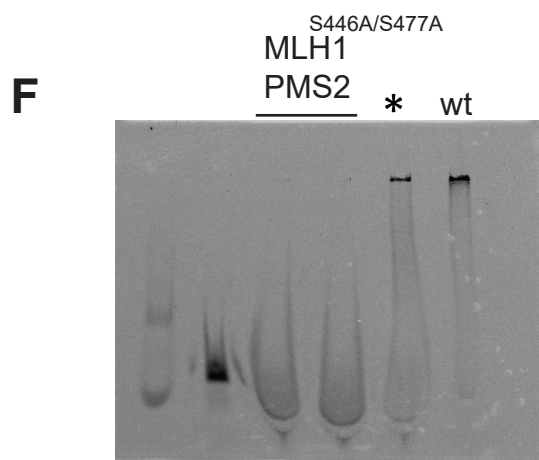

|                         |   |   |   |   |   |
|-------------------------|---|---|---|---|---|
| Marker                  | + | - | - | - | - |
| DNA substrate           | - | + | + | + | + |
| Sepharose-bound protein | - | - | + | + | + |
| CIP                     | - | - | + | - | - |
| Calyculin               | - | - | - | + | - |

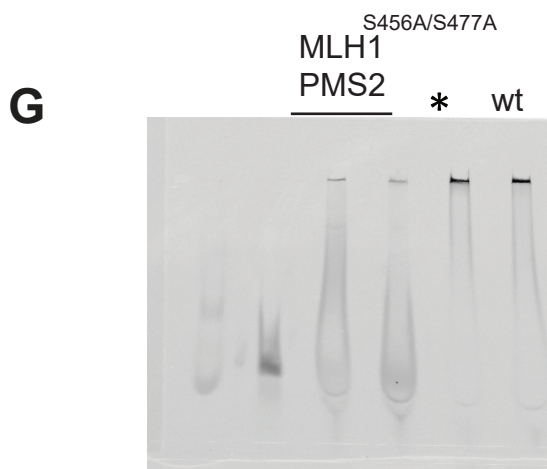

|                         |   |   |   |   |   |
|-------------------------|---|---|---|---|---|
| Marker                  | + | - | - | - | - |
| DNA substrate           | - | + | + | + | + |
| Sepharose-bound protein | - | - | + | + | + |
| CIP                     | - | - | + | - | - |
| Calyculin               | - | - | - | + | - |

\* Data not used.

# Figure S5A

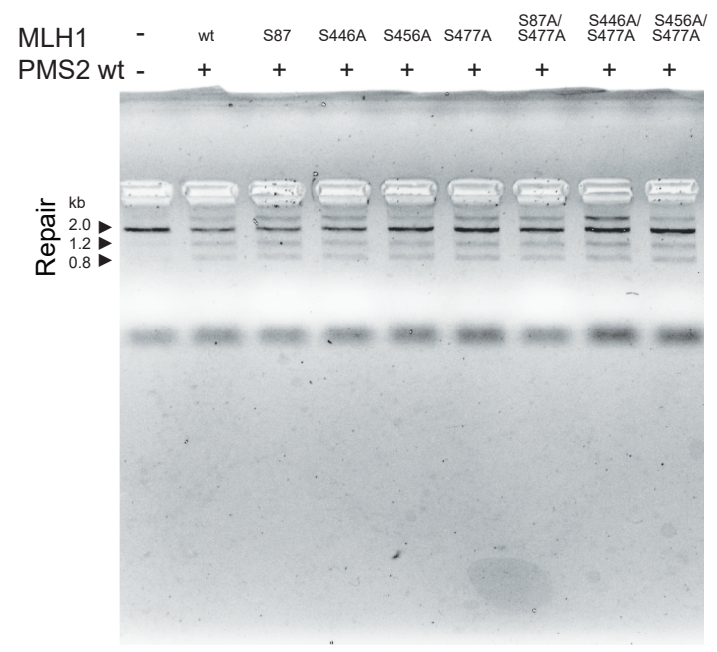

| MMR activity |       |        |       |        |       |       |       |       |       |
|--------------|-------|--------|-------|--------|-------|-------|-------|-------|-------|
| absolute     | 4.75  | 39.72  | 39.26 | 40.36  | 28.87 | 32.62 | 19.42 | 29.25 | 29.84 |
| relative     | 11.97 | 100.00 | 98.85 | 101.63 | 72.70 | 82.14 | 48.90 | 73.64 | 75.13 |

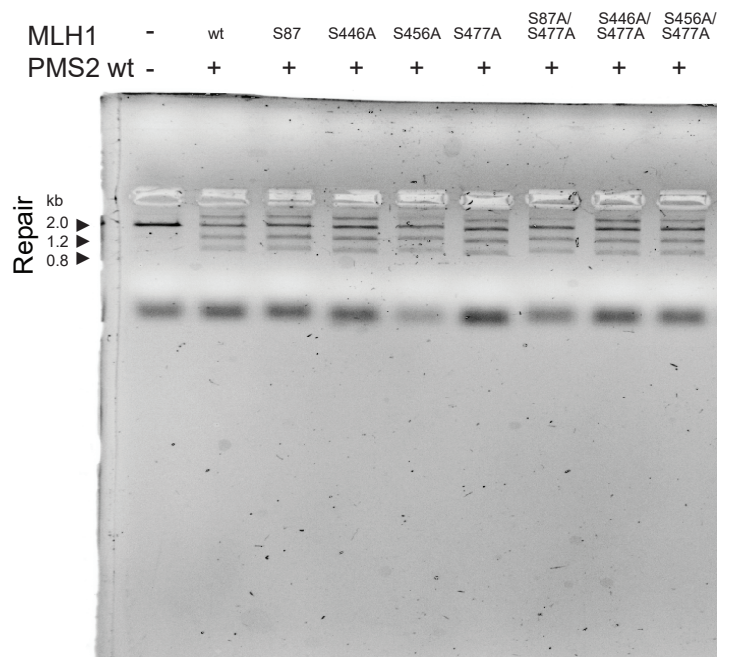

| MMR activity |      |        |        |        |        |        |       |        |        |
|--------------|------|--------|--------|--------|--------|--------|-------|--------|--------|
| absolute     | 1.94 | 45.72  | 51.43  | 57.24  | 58.72  | 47.82  | 43.13 | 58.07  | 51.32  |
| relative     | 4.24 | 100.00 | 112.47 | 125.17 | 128.42 | 104.58 | 94.33 | 126.99 | 112.23 |

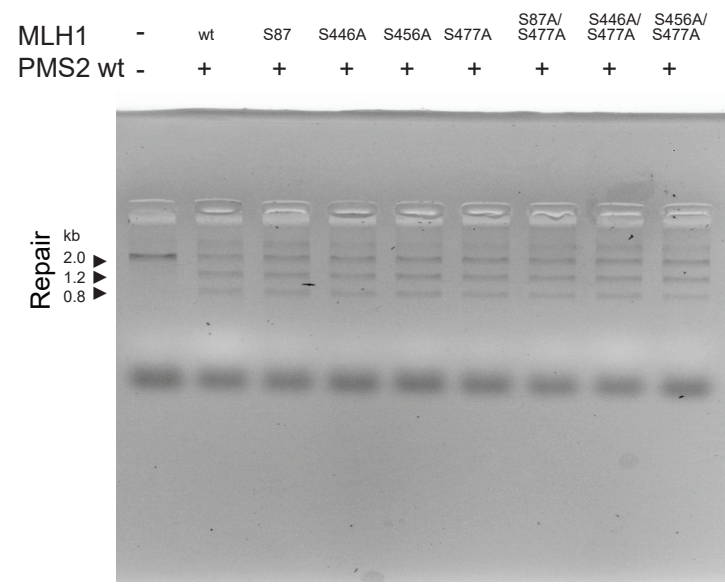

| MMR activity |      |        |       |       |       |       |       |       |       |
|--------------|------|--------|-------|-------|-------|-------|-------|-------|-------|
| absolute     | 3.30 | 83.20  | 45.27 | 73.12 | 55.67 | 43.58 | 75.42 | 66.44 | 64.97 |
| relative     | 3.02 | 100.00 | 54.86 | 83.60 | 67.31 | 52.34 | 90.57 | 81.14 | 77.18 |

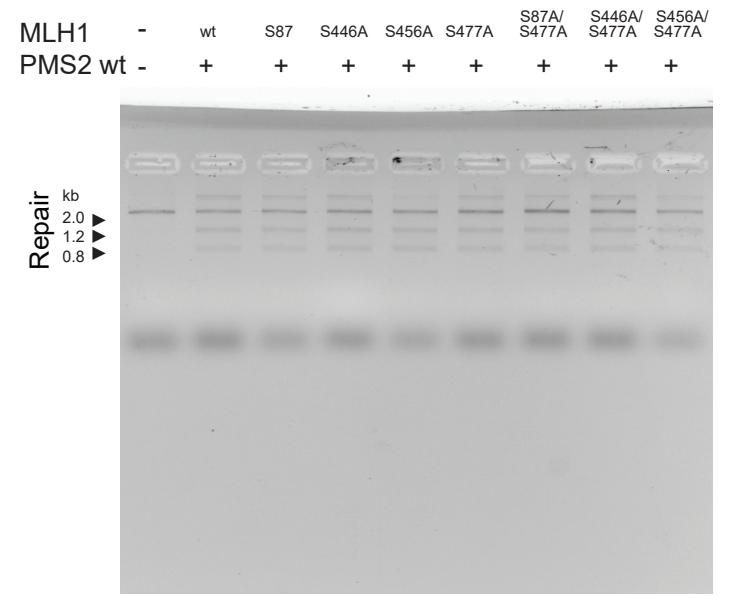

| MMR activity |      |        |       |       |       |       |       |       |       |
|--------------|------|--------|-------|-------|-------|-------|-------|-------|-------|
| absolute     | 1.89 | 39.09  | 34.07 | 33.44 | 35.69 | 31.69 | 24.17 | 33.04 | 34.78 |
| relative     | 4.82 | 100.00 | 87.15 | 85.53 | 91.30 | 81.07 | 61.83 | 84.52 | 88.98 |

# Figure S5B

| MLH1      | - | wt | wt | S87 | S446A | S456A | S477A | S87A/<br>S477A | S446A/<br>S477A | S456A/<br>S477A |
|-----------|---|----|----|-----|-------|-------|-------|----------------|-----------------|-----------------|
| PMS2 wt   | - | +  | +  | +   | +     | +     | +     | +              | +               | +               |
| Calyculin | - | -  | +  | +   | +     | +     | +     | +              | +               | +               |

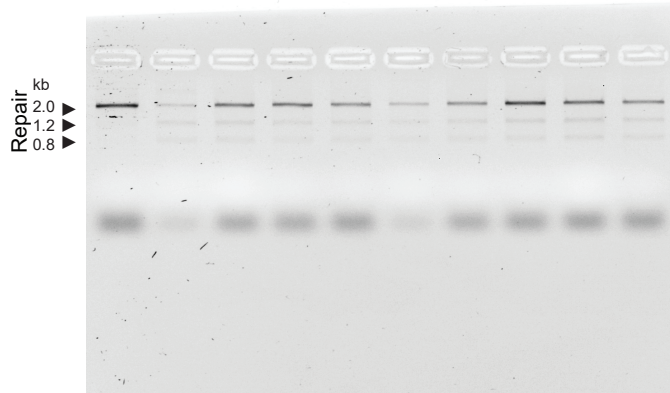

| MMR activity |      |        |       |       |       |       |       |       |       |       |  |
|--------------|------|--------|-------|-------|-------|-------|-------|-------|-------|-------|--|
| absolute     | 4.70 | 25.53  | 11.86 | 4.09  | 8.23  | 16.18 | 15.77 | 12.84 | 20.03 | 14.81 |  |
| relative     | 9.19 | 100.00 | 46.47 | 16.02 | 32.24 | 63.40 | 61.80 | 50.30 | 78.46 | 58.02 |  |

| MLH1      | - | wt | wt | S87 | S446A | S456A | S477A | S87A/<br>S477A | S446A/<br>S477A | S456A/<br>S477A |
|-----------|---|----|----|-----|-------|-------|-------|----------------|-----------------|-----------------|
| PMS2 wt   | - | +  | +  | +   | +     | +     | +     | +              | +               | +               |
| Calyculin | - | -  | +  | +   | +     | +     | +     | +              | +               | +               |

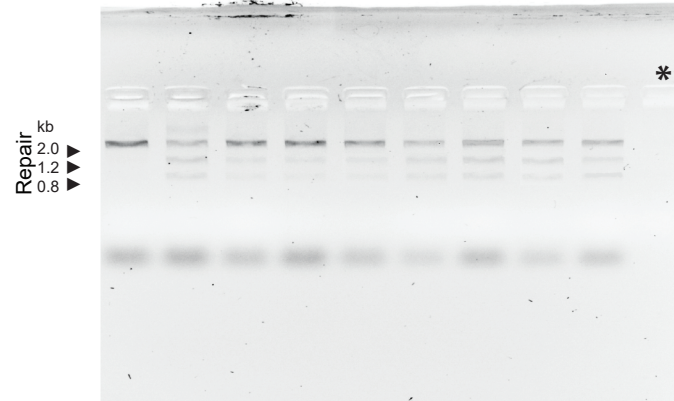

| MMR activity |      |        |       |       |       |       |       |       |       |   |  |
|--------------|------|--------|-------|-------|-------|-------|-------|-------|-------|---|--|
| absolute     | 1.31 | 39.40  | 22.01 | 8.13  | 14.92 | 27.18 | 25.68 | 20.07 | 27.12 | 0 |  |
| relative     | 3.32 | 100.00 | 55.88 | 20.64 | 37.87 | 68.99 | 65.20 | 50.95 | 68.84 | 0 |  |

| MLH1      | - | wt | wt | S87 | S446A | S456A | S477A | S87A/<br>S477A | S446A/<br>S477A | S456A/<br>S477A |
|-----------|---|----|----|-----|-------|-------|-------|----------------|-----------------|-----------------|
| PMS2 wt   | - | +  | +  | +   | +     | +     | +     | +              | +               | +               |
| Calyculin | - | -  | +  | +   | +     | +     | +     | +              | +               | +               |

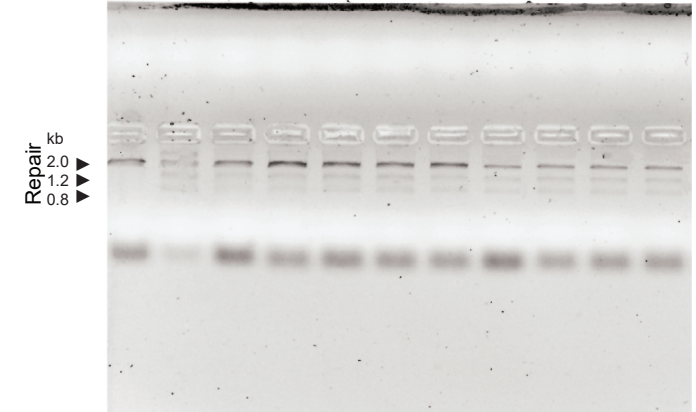

| MMR activity |      |        |       |       |       |       |       |       |       |       |  |
|--------------|------|--------|-------|-------|-------|-------|-------|-------|-------|-------|--|
| absolute     | 1.27 | 55.49  | 25.36 | 8.25  | 17.09 | 27.16 | 34.72 | 29.11 | 32.56 | 33.41 |  |
| relative     | 2.28 | 100.00 | 45.71 | 14.87 | 30.80 | 48.94 | 62.58 | 52.47 | 58.68 | 60.22 |  |

| MLH1      | - | wt | wt | S87 | S446A | S456A | S477A | S87A/<br>S477A | S446A/<br>S477A | S456A/<br>S477A |
|-----------|---|----|----|-----|-------|-------|-------|----------------|-----------------|-----------------|
| PMS2 wt   | - | +  | +  | +   | +     | +     | +     | +              | +               | +               |
| Calyculin | - | -  | +  | +   | +     | +     | +     | +              | +               | +               |

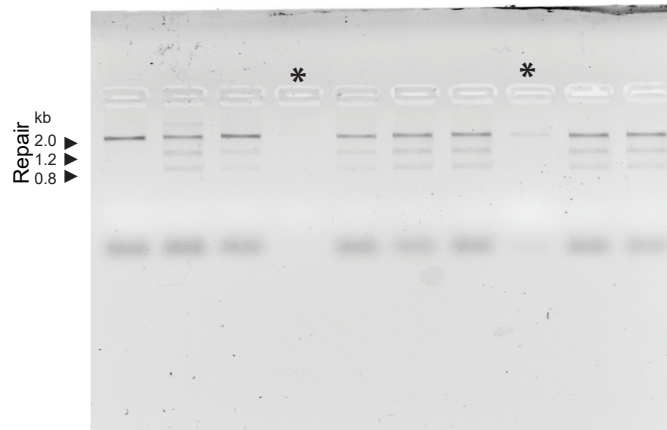

| MMR activity |      |        |       |   |       |       |       |        |       |       |  |
|--------------|------|--------|-------|---|-------|-------|-------|--------|-------|-------|--|
| absolute     | 1.29 | 31.47  | 10.26 | 0 | 8.25  | 16.38 | 19.59 | 53.33  | 17.65 | 16.98 |  |
| relative     | 4.09 | 100.00 | 32.62 | 0 | 26.21 | 52.07 | 62.28 | 169.45 | 56.07 | 53.97 |  |

| MLH1      | - | wt | wt | S87 | S446A | S456A | S477A | S87A/<br>S477A | S446A/<br>S477A | S456A/<br>S477A |
|-----------|---|----|----|-----|-------|-------|-------|----------------|-----------------|-----------------|
| PMS2 wt   | - | +  | +  | +   | +     | +     | +     | +              | +               | +               |
| Calyculin | - | -  | +  | +   | +     | +     | +     | +              | +               | +               |

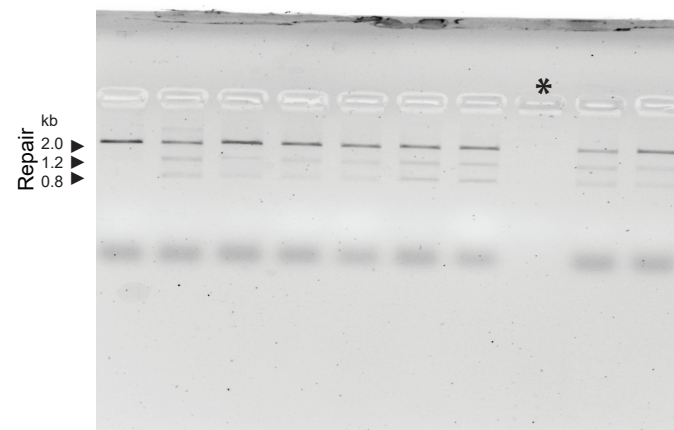

| MMR activity |      |        |       |       |       |       |       |   |       |       |  |
|--------------|------|--------|-------|-------|-------|-------|-------|---|-------|-------|--|
| absolute     | 0.98 | 28.78  | 10.78 | 4.98  | 9.56  | 20.09 | 17.62 | 0 | 28.14 | 16.30 |  |
| relative     | 3.40 | 100.00 | 37.48 | 17.29 | 33.20 | 69.82 | 61.22 | 0 | 97.79 | 56.64 |  |

| MLH1      | - | wt | wt | S87 | S446A | S456A | S477A | S87A/<br>S477A | S446A/<br>S477A | S456A/<br>S477A |
|-----------|---|----|----|-----|-------|-------|-------|----------------|-----------------|-----------------|
| PMS2 wt   | - | +  | +  | +   | +     | +     | +     | +              | +               | +               |
| Calyculin | - | -  | +  | +   | +     | +     | +     | +              | +               | +               |

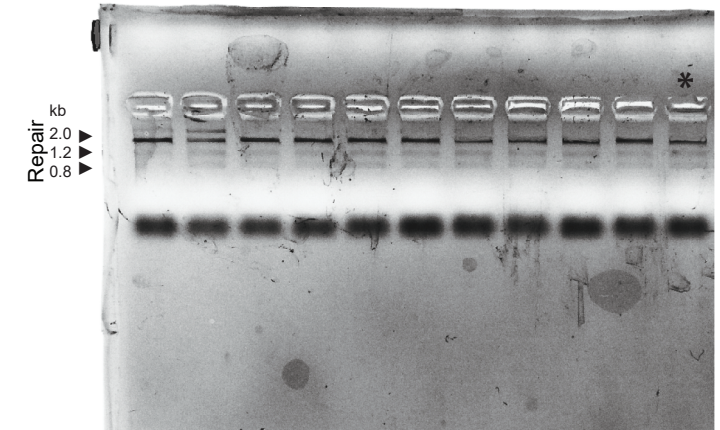

| MMR activity |      |        |       |       |       |       |       |       |       |        |  |
|--------------|------|--------|-------|-------|-------|-------|-------|-------|-------|--------|--|
| absolute     | 2.61 | 37.63  | 17.24 | 9.85  | 11.68 | 19.52 | 21.49 | 17.41 | 18.87 | 47.79  |  |
| relative     | 6.93 | 100.00 | 45.82 | 26.18 | 31.04 | 51.90 | 57.13 | 46.28 | 50.16 | 127.02 |  |

\* Data not used for calculation.

# Figure S6

**A**

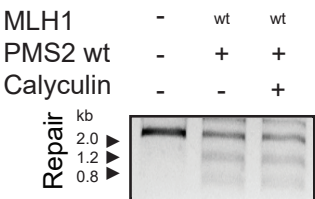

**B**

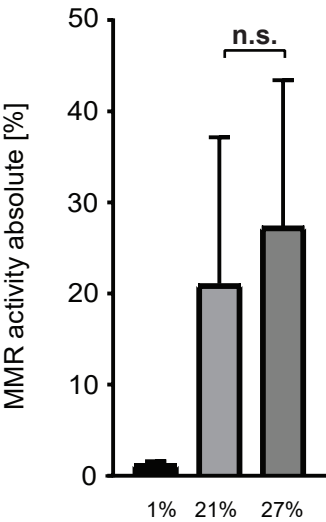

|           |   |    |    |
|-----------|---|----|----|
| MLH1      | - | wt | wt |
| PMS2 wt   | - | +  | +  |
| Calyculin | - | -  | +  |
